# Supplementary material for: Microbiomes in Suspended Soils of Vascular Epiphytes Differ from Terrestrial Soil Microbiomes and from Each Other
Source: MDPI journal article supplement (doi:10.3390/microorganisms9051033), 2021-05-11

**Supplementary Table S1** *The Spearman correlation coefficients for basal respiration and soil nutrient content*

|                                   | <b>BR</b> | <b>P<sub>2</sub>O<sub>5</sub></b> | <b>K<sub>2</sub>O</b> | <b>NH<sub>4</sub></b> | <b>NO<sub>3</sub></b> | <b>Ntot</b> | <b>Ctot</b> |
|-----------------------------------|-----------|-----------------------------------|-----------------------|-----------------------|-----------------------|-------------|-------------|
| <b>BR</b>                         | 1         | 0.91                              | 0.86                  | 0.78                  | 0.03                  | 0.31        | 0.23        |
| <b>P<sub>2</sub>O<sub>5</sub></b> | 0.91      | 1                                 | 0.85                  | 0.75                  | 0.02                  | 0.23        | 0.13        |
| <b>K<sub>2</sub>O</b>             | 0.86      | 0.85                              | 1                     | 0.81                  | 0.23                  | 0.33        | 0.37        |
| <b>NH<sub>4</sub></b>             | 0.78      | 0.75                              | 0.81                  | 1                     | 0.3                   | 0.36        | 0.38        |
| <b>NO<sub>3</sub></b>             | 0.03      | 0.02                              | 0.23                  | 0.30                  | 1                     | 0.64        | 0.67        |
| <b>Ntot</b>                       | 0.31      | 0.23                              | 0.33                  | 0.36                  | 0.64                  | 1           | 0.9         |
| <b>Ctot</b>                       | 0.23      | 0.13                              | 0.37                  | 0.38                  | 0.37                  | 0.9         | 1           |

**Supplementary Fig. S1** Pairwise comparison of OTUs with significant changes in abundance (according DeSEQ2,  $p_{adj} < 0.05$ ) between sample groups - order level (Log2FoldChange - estimated size effect for current OTUs, Order - taxonomic order for current OTUs).

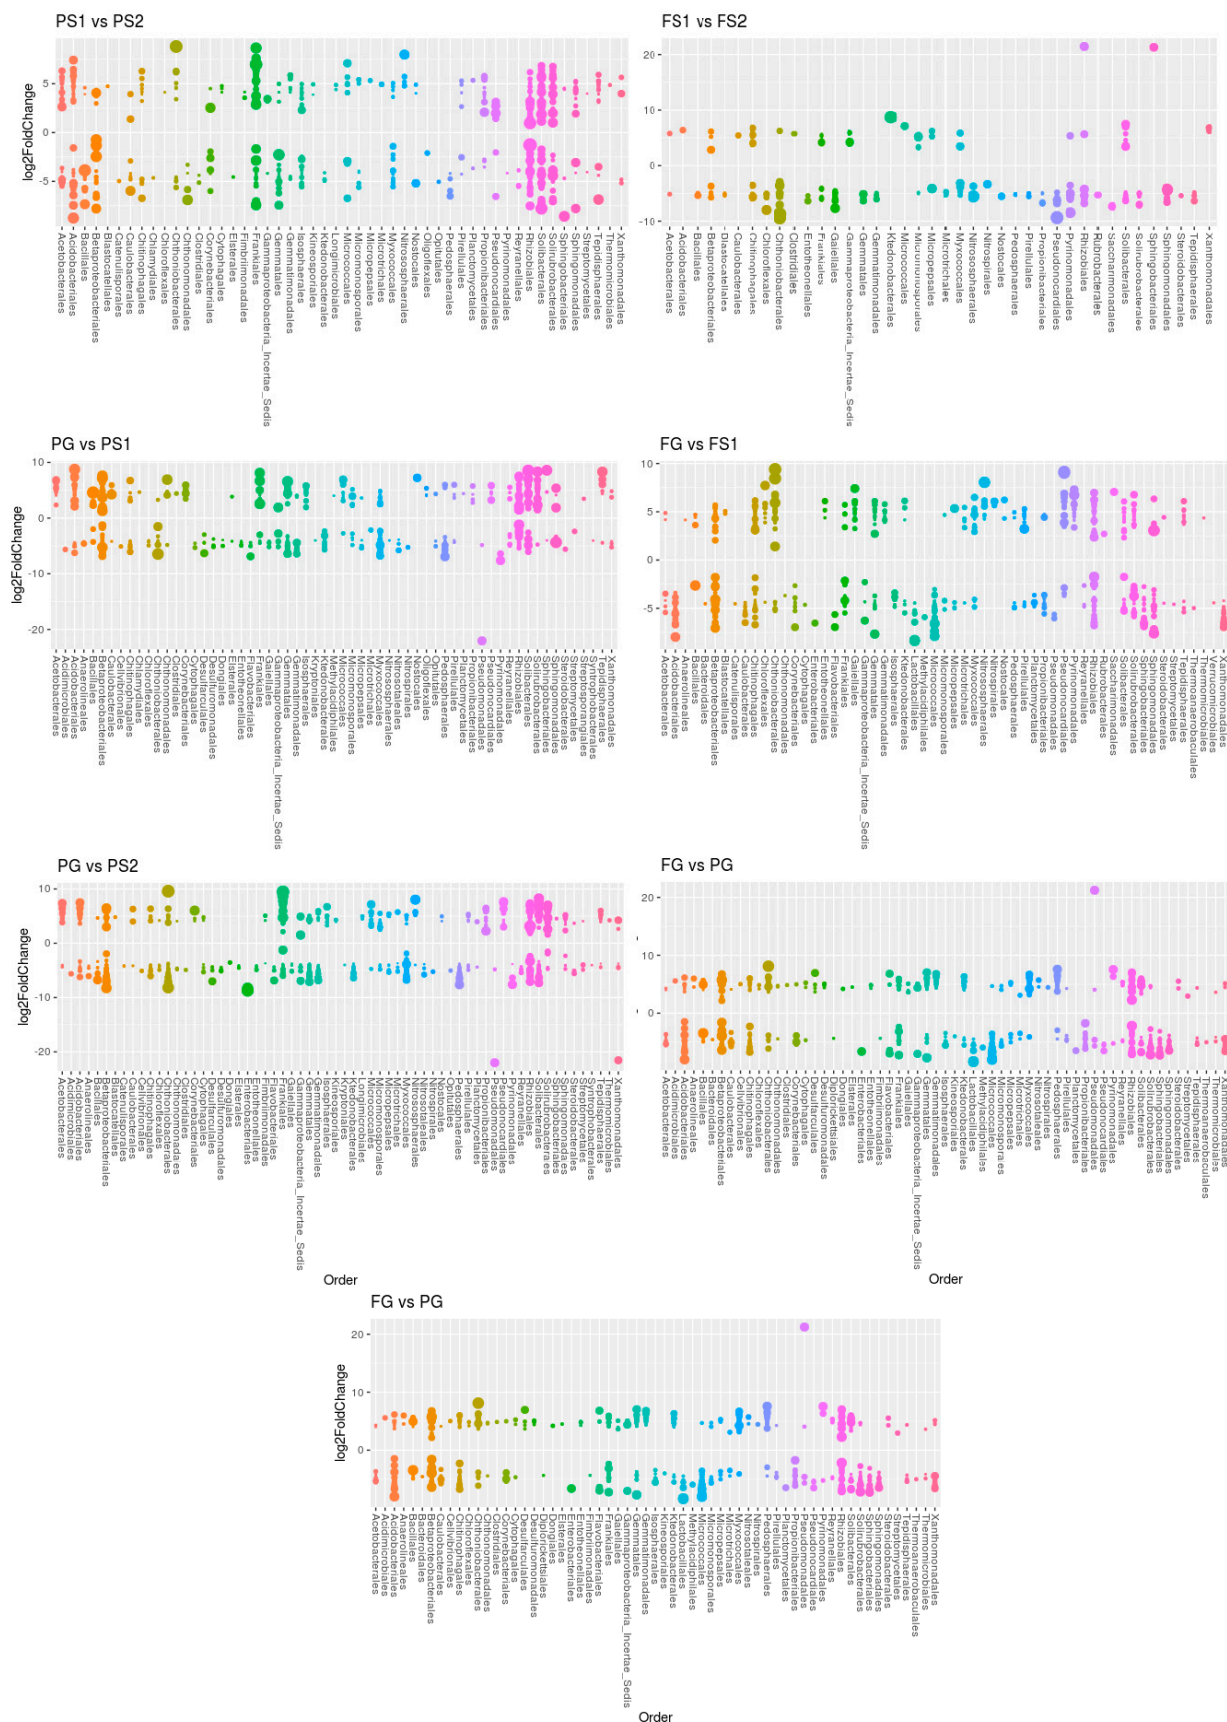

Supplement: s1 [file s1]
